# Supplementary material for: Enhancing Visual Exploration through Augmented Gaze: High Acceptance of Immersive Virtual Biking by Oldest Olds
Source: MDPI journal article supplement (doi:10.3390/ijerph20031671), 2023-01-17
Supplement: s1 [file s1]

## Supplementary Material

| <b>Combined UX</b> | <i>Slope</i> | <i>Lower bound</i> | <i>Upper bound</i> | <i>T-stat</i> | <i>Degrees of freedom</i> | <i>P-value</i> |
|--------------------|--------------|--------------------|--------------------|---------------|---------------------------|----------------|
| AGE                | 0.026        | -0.016             | 0.068              | 1.644         | 51                        | 0.106          |
| GENDER             | -0.325       | -1.008             | 0.358              | -1.272        | 51                        | 0.209          |
| MMSE               | -0.014       | -0.073             | 0.045              | -0.634        | 51                        | 0.529          |
| TINETTI            | 0.024        | -0.029             | 0.077              | 1.213         | 51                        | 0.231          |
| STAY               | 0.010        | -0.008             | 0.028              | 1.497         | 51                        | 0.141          |
| GAIN               | -0.060       | -0.313             | 0.194              | -0.631        | 51                        | 0.531          |
| SESSION DUR        | 0.001        | -0.002             | 0.003              | 0.866         | 51                        | 0.391          |

*Table S1. Results of the mixed-models analysis on the combined user experience (UX) index. Lower bound and Upper bound are the 99% confidence intervals of the Slope. Statistical significance at the 0.01 level is highlighted in bold. A p-value of 0.000 means significance below 0.0005.*

| <b>SSQ</b>  | <i>Slope</i> | <i>Lower bound</i> | <i>Upper bound</i> | <i>T-stat</i> | <i>Degrees of freedom</i> | <i>P-value</i> |
|-------------|--------------|--------------------|--------------------|---------------|---------------------------|----------------|
| AGE         | 0.151        | -0.416             | 0.718              | 0.711         | 51                        | 0.480          |
| GENDER      | 0.920        | -8.300             | 10.141             | 0.267         | 51                        | 0.791          |
| MMSE        | -0.203       | -0.997             | 0.592              | -0.682        | 51                        | 0.498          |
| TINETTI     | 0.192        | -0.526             | 0.909              | 0.714         | 51                        | 0.478          |
| STAY        | 0.009        | -0.236             | 0.254              | 0.101         | 51                        | 0.920          |
| GAIN        | -0.130       | -3.811             | 3.551              | -0.095        | 51                        | 0.925          |
| SESSION DUR | -0.003       | -0.039             | 0.033              | -0.215        | 51                        | 0.830          |

*Table S2. Same as Table S1 but for SSQ score.*

| <b>Session duration</b> | <i>Slope</i> | <i>Lower bound</i> | <i>Upper bound</i> | <i>T-stat</i> | <i>Degrees of freedom</i> | <i>P-value</i> |
|-------------------------|--------------|--------------------|--------------------|---------------|---------------------------|----------------|
| AGE                     | 0.039        | -0.114             | 0.191              | 0.680         | 52                        | 0.500          |
| GENDER                  | -0.706       | -3.235             | 1.822              | -0.747        | 52                        | 0.459          |
| MMSE                    | -0.003       | -0.221             | 0.215              | -0.036        | 52                        | 0.972          |
| TINETTI                 | 0.005        | -0.191             | 0.202              | 0.072         | 52                        | 0.943          |
| STAY                    | -0.004       | -0.070             | 0.063              | -0.153        | 52                        | 0.879          |
| GAIN                    | 0.168        | -0.662             | 0.998              | 0.541         | 52                        | 0.591          |

*Table S3. Same as Table S1 but for session duration.*

| <b>Pedalling duration</b> | <i>Slope</i> | <i>Lower bound</i> | <i>Upper bound</i> | <i>T-stat</i> | <i>Degrees of freedom</i> | <i>P-value</i> |
|---------------------------|--------------|--------------------|--------------------|---------------|---------------------------|----------------|
| AGE                       | -2.721       | -10.243            | 4.801              | -0.967        | 52                        | 0.338          |
| GENDER                    | 15.057       | -109.684           | 139.798            | 0.323         | 52                        | 0.748          |
| MMSE                      | -5.801       | -16.542            | 4.940              | -1.444        | 52                        | 0.155          |
| TINETTI                   | 0.204        | -9.473             | 9.880              | 0.056         | 52                        | 0.955          |
| STAY                      | 0.562        | -2.673             | 3.797              | 0.465         | 52                        | 0.644          |
| GAIN                      | -19.992      | -52.821            | 12.837             | -1.628        | 52                        | 0.110          |

*Table S4. Same as Table S1 but for pedalling duration.*

| <b>Head rotation</b> | <i>Slope</i> | <i>Lower bound</i> | <i>Upper bound</i> | <i>T-stat</i> | <i>Degrees of freedom</i> | <i>P-value</i> |
|----------------------|--------------|--------------------|--------------------|---------------|---------------------------|----------------|
| AGE                  | -0.020       | -0.046             | 0.006              | -2.018        | 51                        | 0.049          |
| GENDER               | 0.425        | 0.022              | 0.828              | 2.822         | 51                        | <b>0.007</b>   |
| MMSE                 | -0.016       | -0.051             | 0.019              | -1.229        | 51                        | 0.225          |
| TINETTI              | 0.005        | -0.026             | 0.037              | 0.434         | 51                        | 0.666          |
| STAY                 | -0.004       | -0.015             | 0.008              | -0.870        | 51                        | 0.388          |
| GAIN                 | -0.219       | -0.345             | -0.093             | -4.652        | 51                        | <b>0.000</b>   |
| SESSION DUR          | 0.001        | -0.001             | 0.002              | 1.304         | 51                        | 0.198          |

*Table S5. Same as Table S1 but for head rotation.*

| <b>Visual shift</b> | <i>Slope</i> | <i>Lower bound</i> | <i>Upper bound</i> | <i>T-stat</i> | <i>Degrees of freedom</i> | <i>P-value</i> |
|---------------------|--------------|--------------------|--------------------|---------------|---------------------------|----------------|
| AGE                 | -0.018       | -0.045             | 0.009              | -1.822        | 51                        | 0.074          |
| GENDER              | 0.420        | 0.002              | 0.837              | 2.691         | 51                        | 0.010          |
| MMSE                | -0.015       | -0.051             | 0.021              | -1.103        | 51                        | 0.275          |
| TINETTI             | 0.003        | -0.029             | 0.036              | 0.274         | 51                        | 0.785          |
| STAY                | -0.004       | -0.015             | 0.008              | -0.828        | 51                        | 0.412          |
| GAIN                | 0.334        | 0.202              | 0.467              | 6.763         | 51                        | <b>0.000</b>   |
| SESSION DUR         | 0.001        | -0.001             | 0.002              | 1.439         | 51                        | 0.156          |

*Table S6. Same as Table S1 but for visual rotation.*
